# Supplementary material for: Albumin-stabilized manganese-based nanocomposites with sensitive tumor microenvironment responsivity and their application for efficient SiRNA delivery in brain tumors
Source: Royal Society of Chemistry journal article supplement (doi:10.1039/c9tb02341k), 2020-01-01
Supplement: c9tb02341k1.pdf [file c9tb02341k1.pdf]

## Supplemental Information

### **Albumin-Stabilized Manganese-Based Nanocomposites with Sensitive Tumor Microenvironment Responsivity and Their Application for Efficient SiRNA Delivery in Brain Tumor**

Kai Xu,<sup>ab</sup> Zhenghuan Zhao,<sup>c</sup> Junfeng Zhang,<sup>ab</sup> Wei Xue,<sup>ab</sup> Haipeng Tong,<sup>ab</sup>  
Heng Liu,<sup>\*d</sup> and Weiguo Zhang<sup>\*ab</sup>

<sup>a</sup>Department of Radiology, Daping Hospital, Army Medical University, Chongqing 400042, China.

<sup>b</sup>Chongqing Clinical Research Center for Imaging and Nuclear Medicine, Chongqing 400042, China.

<sup>c</sup>College of Pharmaceutical Science, Southwest University, Chongqing 400716, China.

<sup>d</sup>Department of Radiology, PLA Rocket Force Characteristic Medical Center, Beijing, 100088, China.

Corresponding to: Heng Liu ([liuheng0918@163.com](mailto:liuheng0918@163.com)); Weiguo Zhang (E-mail: [wgzhang01@163.com](mailto:wgzhang01@163.com) )

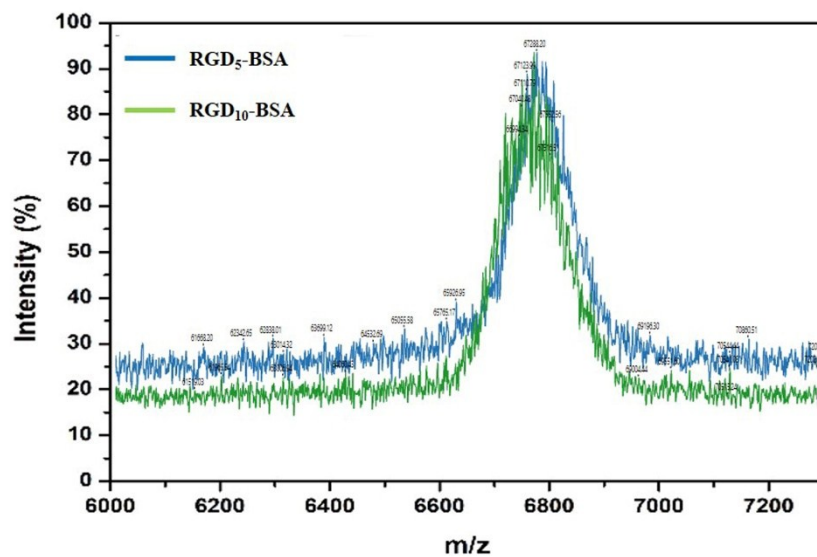

**Figure S1.** MALDI-TOF-MS analysis of RGD<sub>5</sub>-BSA (molar ratio of RGD:BSA=5:1) and RGD<sub>10</sub>-BSA (molar ratio of RGD:BSA=10:1).

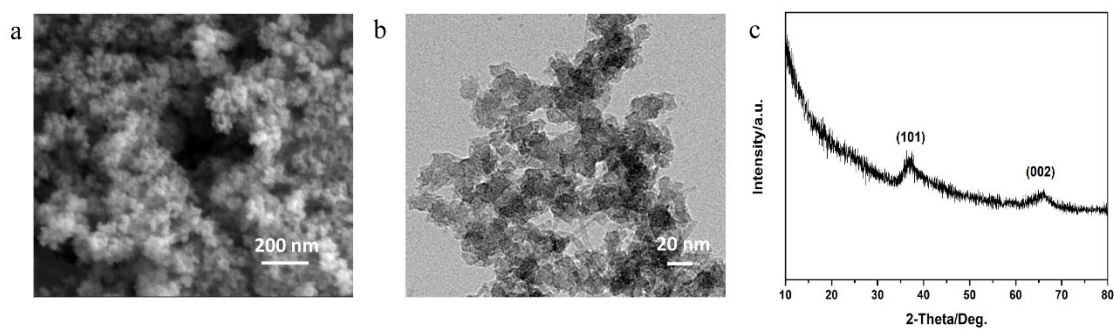

**Figure S2.** Characterization of MnO<sub>2</sub> NPs. (a) SEM image of MnO<sub>2</sub> NPs. (b) TEM image of MnO<sub>2</sub> NPs. (c) XRD pattern of MnO<sub>2</sub> NPs.

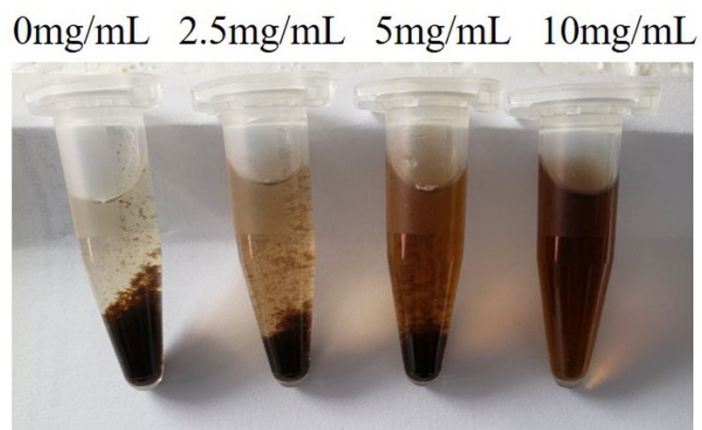

**Figure S3.** RGD-BMnNPs with different concentrations of BSA.

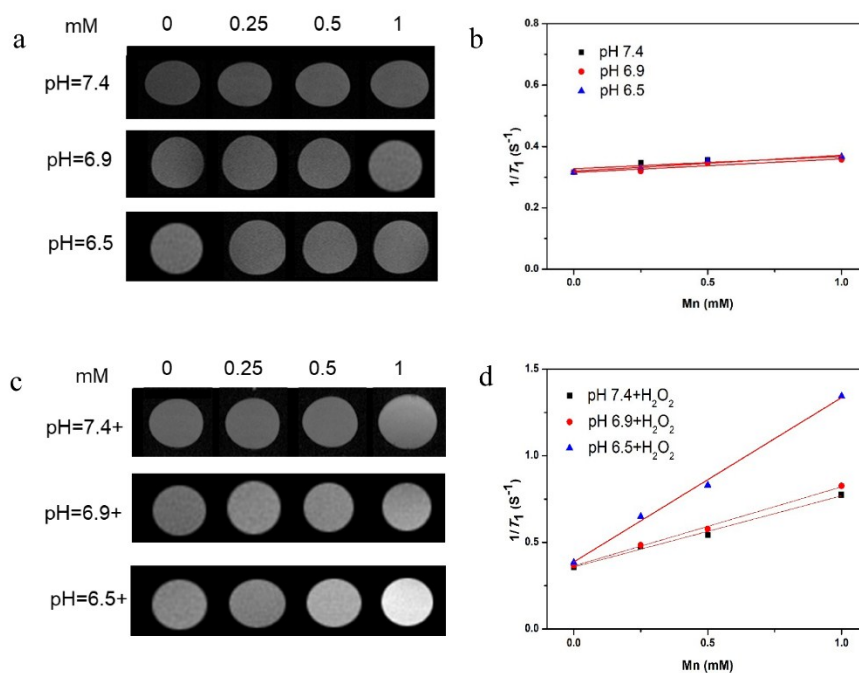

**Figure S4.**  $T_1$ -weighted MR images and  $r_1$  relaxivities of  $MnO_2$  NPs in various solutions as a function of Mn concentrations. (a)  $T_1$ -weighted MR images of  $MnO_2$  NPs at pH=6.5-7.4 without  $H_2O_2$ . (b)  $r_1$  relaxivities of  $MnO_2$  NPs at pH=6.5-7.4 without  $H_2O_2$ . (c)  $T_1$ -weighted MR images of  $MnO_2$  NPs at pH=6.5-7.4 with  $H_2O_2$ . (d)  $r_1$  relaxivities of  $MnO_2$  NPs at pH=6.5-7.4 with  $H_2O_2$ .

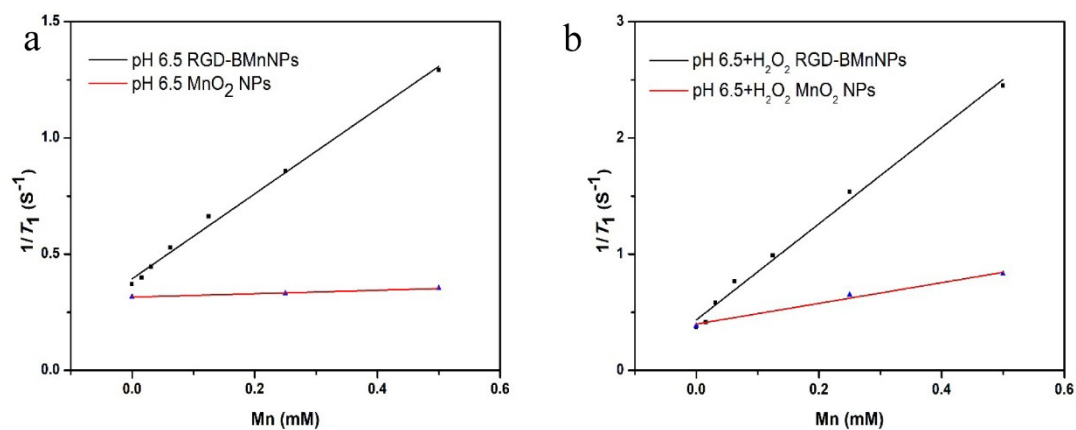

Figure S5. The comparison of MnO<sub>2</sub> NPs and RGD-BMnNPs. (a)  $r_1$  relaxivities of MnO<sub>2</sub> NPs and RGD-BMnNPs at pH=6.5 without H<sub>2</sub>O<sub>2</sub>. (b)  $r_1$  relaxivities of MnO<sub>2</sub> NPs and RGD-BMnNPs at pH=6.5 with H<sub>2</sub>O<sub>2</sub>.

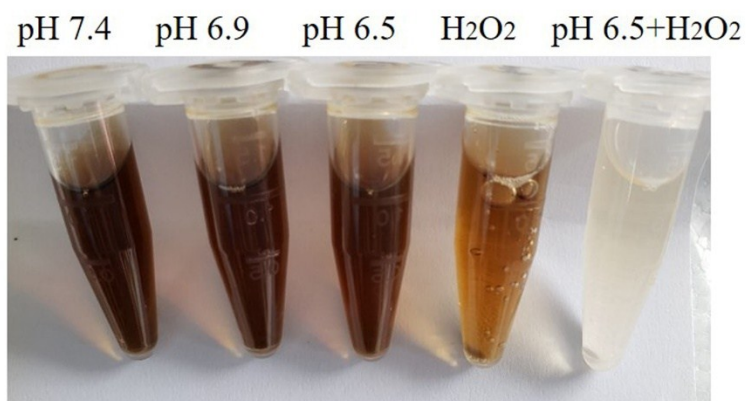

Figure S6. RGD-BMnNPs in different solutions.

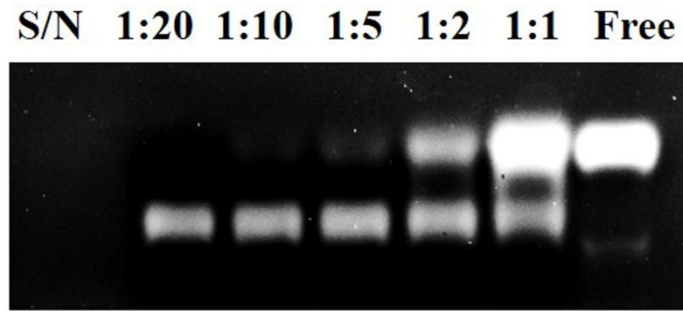

**Fig S7.** Agarose gel electrophoresis analysis of RGD-BMnNPs loading siRNA (siRNA:RGD-BMnNPs mass ratio).

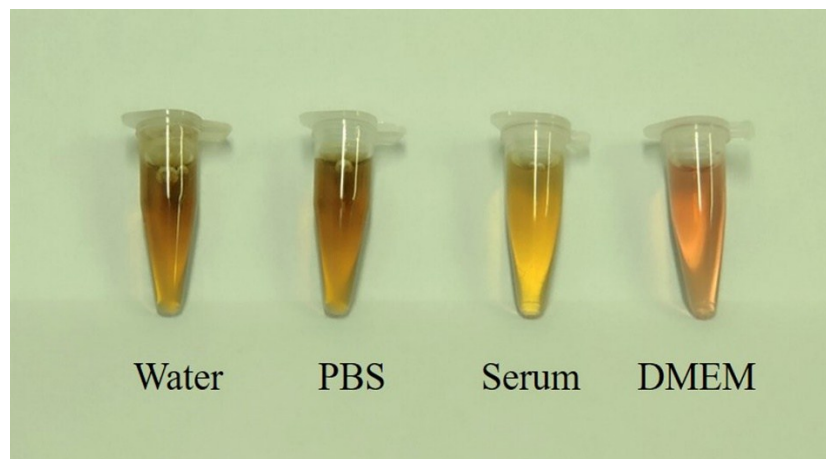

**Figure S8.** Stability of RGD-BMnNPs/VEGFA-siRNA-Cy5 in various solutions at 24 h after incubation.

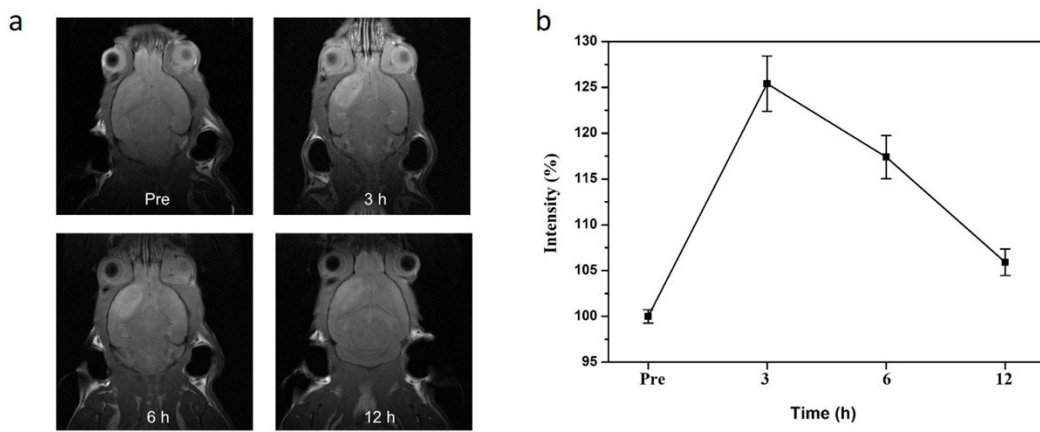

**Figure S9.** (a)  $T_1$ -weighted MR images of U87MG tumor-bearing mouse prior to and at different time points post intravenous of RGD-BMnNPs. (b) Signal intensity of  $T_1$ -weighted MR images from Figure a.

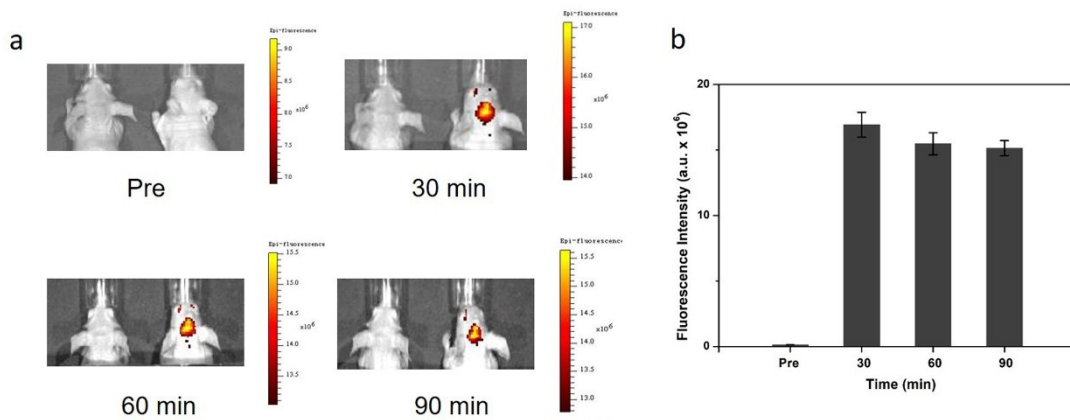

**Figure S10.** (a) Fluorescence images of U87MG tumor-bearing mouse prior to and at different time points post intravenous injection of RGD-BMnNPs. (b) Signal intensity of fluorescence images from Figure a.

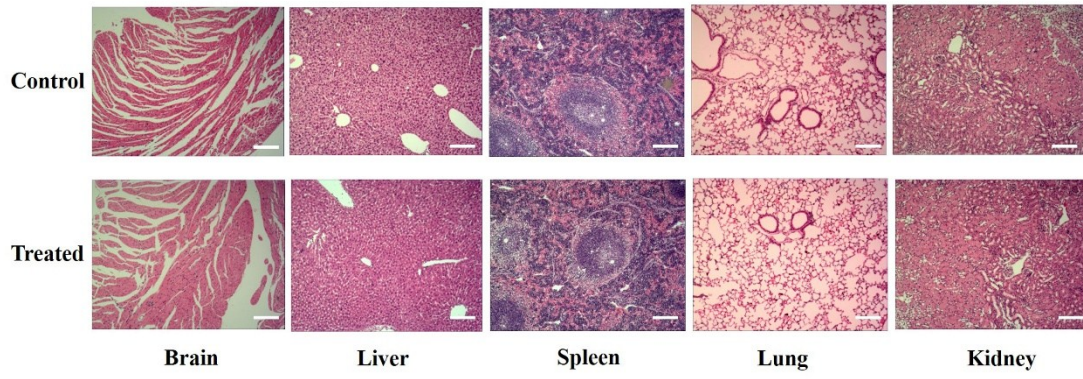

**Figure S11.** H&E stained histological sections of major organs including heart, liver, spleen, lung and kidneys obtained from mice at 28 days post-treatment. Scale bar, 100  $\mu\text{m}$ .
